1 **Biogenesis of hepatitis B virus e antigen is driven by translocon-associated protein complex**  
2 **and regulated by conserved cysteines in signal peptide**

3  
4 Helena Záborská, Aleš Záborský, Barbora Lubyová, Jan Hodek, Alena Křenková, Martin  
5 Hubálek, Jan Weber and Iva Pichová<sup>#</sup>

6  
7 Institute of Organic Chemistry and Biochemistry of the Czech Academy of Sciences, Flemingovo  
8 náměstí 2, 166 10 Prague, Czech Republic

9  
10 Running Title: Regulation of HBV precore translocation

11

12

13 <sup>#</sup> Address correspondence to Iva Pichova, [iva.pichova@uochb.cas.cz](mailto:iva.pichova@uochb.cas.cz).

14

15

16

17

18

19

20

21

22

23

24 **Abstract**

25 Hepatitis B virus (HBV) uses e antigen (HBe), which is dispensable for virus infectivity, to  
26 modulate host immune responses and achieve viral persistence in human hepatocytes. The HBe  
27 precursor (p25) is directed to the endoplasmic reticulum (ER), where cleavage of the signal peptide  
28 (sp) gives rise to the first processing product, p22. P22 can be retro-translocated back to the cytosol  
29 or enter the secretory pathway and undergo a second cleavage event, resulting in secreted p17  
30 (HBe). Here, we report that translocation of p25 to the ER is promoted by translocon-associated  
31 protein complex (TRAP). We found that p25 is not completely translocated into the ER; a fraction  
32 of p25 is phosphorylated and remains in the cytoplasm and nucleus. Within the p25 sp sequence,  
33 we identified three cysteine residues that control the efficiency of sp cleavage and contribute to  
34 proper subcellular distribution of the precore pool.

35

36

37 **Keywords:** Hepatitis B virus, HBV precore protein, HBe, signal peptide, cysteine residues, TRAP  
38 complex, ER translocation

39

40

41 **Abbreviations**

42 HBV, hepatitis B virus; sp, signal peptide; ER, endoplasmic reticulum; HBc, hepatitis B core  
43 antigen; HBe, hepatitis B precore antigen;  $\lambda$ -PP,  $\lambda$ -protein phosphatase; DTT, dithiothreitol; TRAP,  
44 translocon-associated protein complex

45

46

## 47 **Introduction**

48           Hepatitis B is a liver infection caused by the hepatitis B virus (HBV), which can induce  
49 both acute and chronic disease and is a major global health problem. According to the World Health  
50 Organization, an estimated 257 million people worldwide are infected with HBV. HBV, a member  
51 of the *Hepadnaviridae* family, is a small enveloped DNA virus with a genome containing only four  
52 open reading frames (C, P, S, and X) that largely overlap and encode multiple proteins using  
53 different in-frame start codons. For example, the HBV preC-C gene gives rise to two different  
54 products translated from distinct mRNAs – core protein (HBc) and precore protein (HBe). Despite  
55 their high sequence similarity, these proteins exhibit different functions and subcellular  
56 localizations. HBc is a cytosolic protein with a molecular weight of 21 kDa responsible for the  
57 assembly of icosahedral viral particles and pre-genomic RNA encapsidation. On the other hand,  
58 the precore precursor, which includes the entire core protein sequence, undergoes a two-step  
59 maturation process resulting in production of the extracellular immunomodulatory HBe antigen.

60           Precore is translated with a 29-amino-acid N-terminal sequence that leads this 25-kDa  
61 protein (p25) into the endoplasmic reticulum (ER), where the signal peptide (sp) comprising the  
62 first 19 amino acids (the pre sequence) is cleaved off, producing a 22-kDa precore protein (p22)  
63 (1). The remaining 10-amino-acid extension at the p22 N-terminus, termed precore propeptide (pro  
64 sequence), is not present in the core protein and plays a crucial role in precore folding. An  
65 intrasubunit disulfide bond between Cys -7 within the propeptide sequence and Cys 61 changes the  
66 dimerization interface, prevents multimerization, and holds the protein in a dimeric state (2–4). The  
67 majority of p22 is further processed at its C-terminus by furin protease in the trans-Golgi network,  
68 giving rise to mature HBe antigen (p17). The mature antigen is secreted (5–8) and performs an  
69 immunomodulatory function in the establishment of persistent infection (9–12).

70           However, approximately 15–20% of p22 does not enter the secretory pathway and is  
71 retrotranslocated back to the cytosol and transported into the nucleus (13–15). The biological  
72 function of precore protein in the cytoplasm and nucleus remains poorly understood. P22 can form  
73 heterodimers with the core protein and destabilize the viral particle, which may negatively regulate  
74 viral infection (16). Conditional expression of precore protein may alter the expression profile of  
75 several host genes in transfected hepatocytes (17). Precore also may influence the Rab-7 dependent  
76 regulation of HBV secretion (18), promote hepatocellular carcinogenesis by affecting the stability  
77 and activity of the p53 tumor suppressor (19), and influence the antiviral signaling of IFN- $\alpha$  (20).

78           The mechanism by which p22 is distributed to different cellular compartments remains  
79 unclear. The Sec61 translocon, together with associated protein complexes, serves as a crossroad  
80 for protein translocation into the ER as well as for export via the ER-associated protein degradation  
81 (ERAD) pathway [reviewed in (21)]. One member of this machinery, the ER-resident chaperone  
82 GRP78/BiP, plays a role in retrotransport of p22 from ER to the cytosol (13). GRP78/BiP  
83 participates not only in binding the proteins subjected to ERAD but also in mediating translocon  
84 gating (22–24). Another factor that can support protein translocation and Sec61 translocon channel  
85 opening in a substrate-specific manner is the translocon-associated protein complex (TRAP), which  
86 consists of four subunits ( $\alpha$ ,  $\beta$ ,  $\gamma$ ,  $\delta$ ) and supports Sec61 gating for proteins with weak signal  
87 sequences (25–28).

88           Despite recent progress in understanding the intracellular pathways of individual precore  
89 forms and growing evidence for their specific roles, many aspects of cytosolic p25 and p22 protein  
90 function remain unclear. Furthermore, the mechanism that determines the distribution of precore  
91 forms to the secretory or retrotranslocation pathways is not understood. Here, we reveal that  
92 conserved Cys residues in the sp sequence are critical for the rate of p25 processing and appear to

93 serve as an auto-regulating factor that influences the intracellular localization of precore. We also  
94 describe how the host factor TRAP promotes efficient precore protein ER translocation and  
95 prevents mislocalization.

96

## 97 **Results**

98 **A fraction of the cytosolic p25 precursor is phosphorylated.** To investigate in detail the  
99 process of precore maturation, we performed <sup>35</sup>S metabolic labeling of cells transiently transfected  
100 with an HBe-producing construct (pCEP HBeM1A, resulting protein denoted HBe or precore wt),  
101 in which the internal ATG initiation triplet for the core protein (HBc) was mutated (Met/Ala  
102 mutation in position 1) (Fig. 1). Huh7 cells were labeled for 30 min, lysed and HBV precore-related  
103 proteins were immunoprecipitated with anti-core polyclonal antibody. Although p22 was the  
104 predominant species, we also observed a significant portion of unprocessed p25 (around 30% of  
105 the total precore signal in pulse samples), indicating that either translocation to the ER or sp  
106 cleavage was not 100% efficient. Furthermore, p25 appeared as a double band, suggesting that a  
107 portion of it was post-translationally modified (Fig. 2A).

108

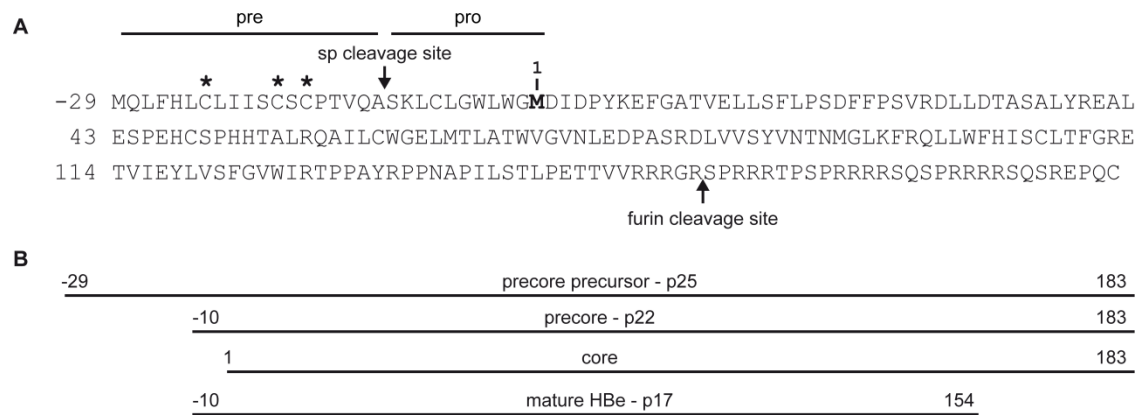

109  
110 **Fig. 1. HBV precore precursor and related protein products.** (A) Sequence of the precore precursor p25.  
111 Cysteine residues at positions -23, -18, and -16 are marked by asterisks. The initial methionine of the core  
112 protein in position 1 is labeled in bold, and the sites of signal peptide (sp) cleavage and p17 proteolytic  
113 maturation are indicated with arrows. (B) Schematic representation of individual preC/C gene products.  
114

115 Because HBV core and p22 are both known to be phosphorylated (29), we investigated the  
116 possibility that the upper p25 band (denoted as p25<sup>p</sup>) represents an un-translocated version of p25  
117 that is phosphorylated in the cytoplasm. Treating the immunoprecipitated samples of precore  
118 proteins with  $\lambda$ -protein phosphatase ( $\lambda$ -PP) resulted in disappearance of the p25<sup>p</sup> form,  
119 accompanied by enrichment of p25 as visualized by autoradiography (Fig. 2A). These data  
120 demonstrate that a significant amount of p25 is not processed by the signal peptidase in the ER and  
121 is phosphorylated.

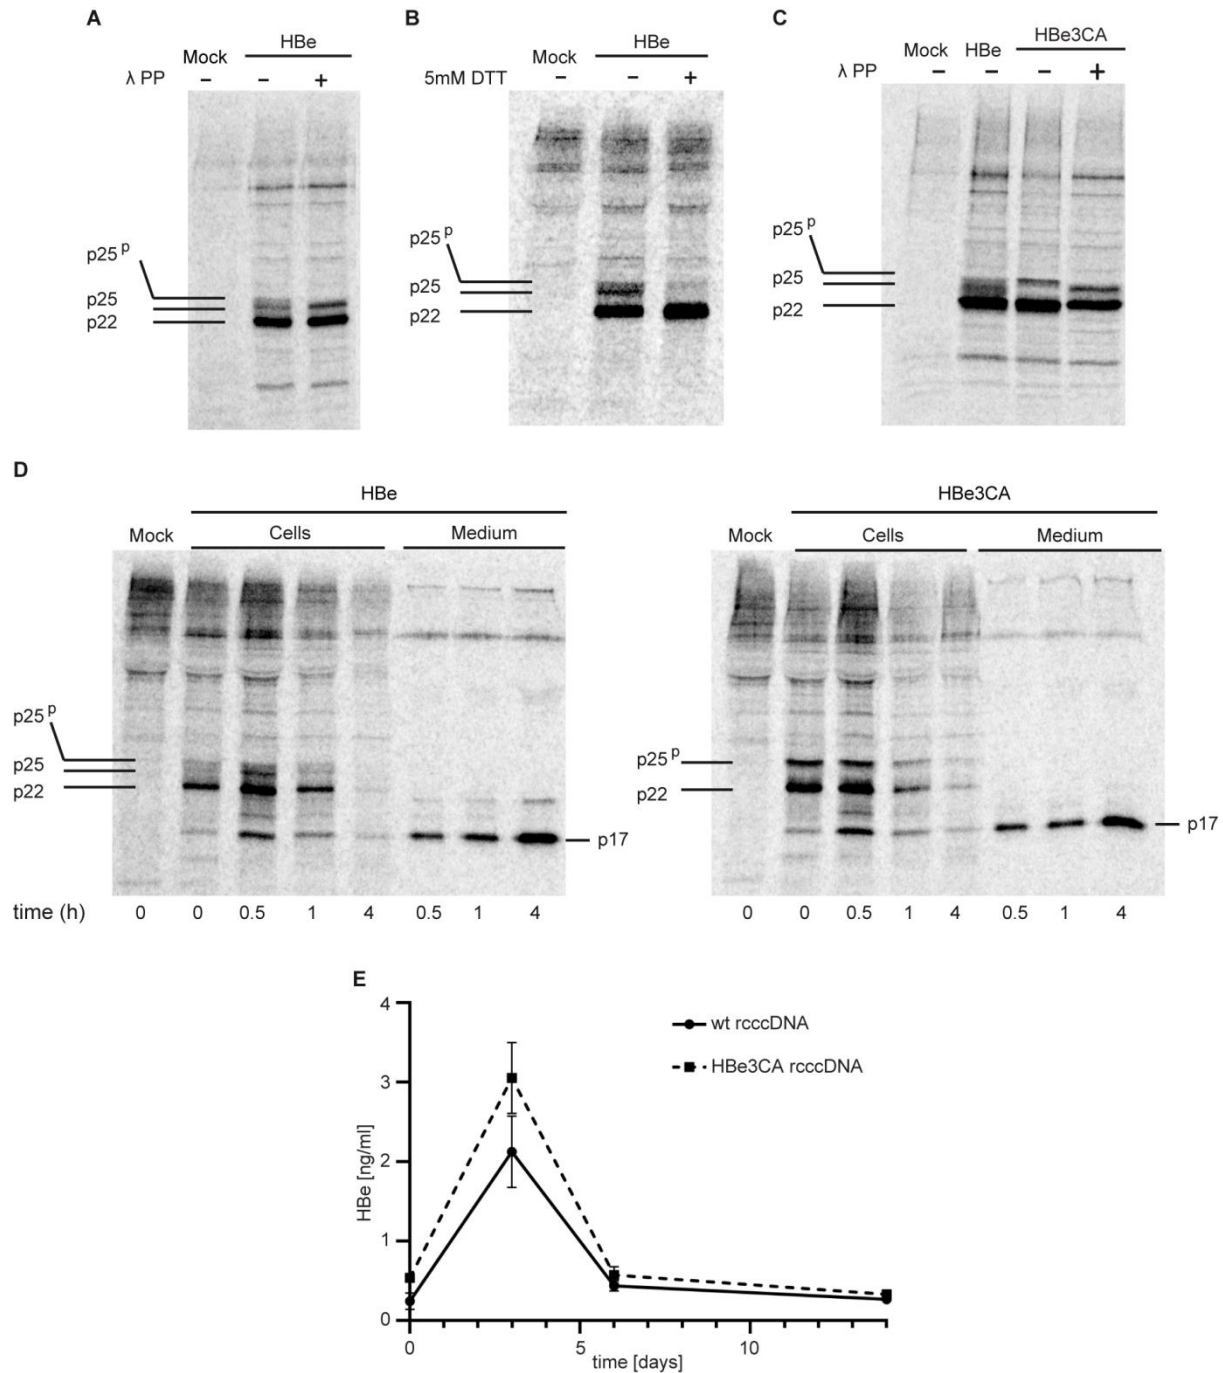

122

123

124 **Fig. 2. Analysis of p25 protein phosphorylation and effect of mutation of Cys residues in the sp**  
 125 **sequence on HBV precore protein processing and virus infectivity.** (A) Huh7 cells expressing HBV  
 126 precore precursor were metabolically labeled for 30 min with <sup>35</sup>S, lysed, and subjected to  
 127 immunoprecipitation with anti-core antibody. Immunoprecipitated samples were untreated (-) or treated (+)  
 128 with λ protein phosphatase and separated by SDS-PAGE. The electrophoretic mobility of precore related

129 proteins was analyzed by autoradiography. The migration positions of the HBV precore forms p25<sup>p</sup>, p25,  
130 and p22 are indicated. **(B)** Ratios of individual precore protein forms produced in the presence (+) or absence  
131 (-) of dithiothreitol (DTT). Huh7 cells expressing the precore precursor were metabolically labeled for 30  
132 min with <sup>35</sup>S under standard or reducing (5 mM DTT) conditions. HBV precore-derived proteins were  
133 immunoprecipitated from the harvested cells with anti-core antibody, separated by SDS-PAGE, and  
134 analyzed by autoradiography. **(C)** Electrophoretic mobility comparison of HBe and the HBe3CA mutant.  
135 The experiment was performed as for Fig. 2A, (+) phosphorylation of HBe3CA p25 protein was  
136 demonstrated by λ-PP treatment. **(D)** Pulse-chase analysis of precore protein processing and secretion. Huh7  
137 cells expressing HBe or HBe3CA proteins were metabolically labeled for 30 min with <sup>35</sup>S, and then chased  
138 for 0.5, 1, and 4 h. At all time points, both cells and media were harvested and subjected to  
139 immunoprecipitation with anti-core antibody. Proteins were separated by SDS-PAGE and analyzed by  
140 autoradiography. **(E)** Comparison of HBe secretion by cells infected with wild type and mutant precore  
141 rcccDNA. HepG2-NTCP cells in 12-well plates were infected in triplicate with wild type rcccDNA (wt  
142 rcccDNA) and mutant precore rcccDNA (HBe3CA rcccDNA) with equal MOI of 2000 VGE/cell. Secretion  
143 of HBe in the culture supernatants was determined by ELISA at days 0, 3, 6, and 14. Data are plotted as  
144 mean ± SEM of three biological replicates.

145  
146 **Reducing conditions or mutation of Cys residues in the sp of p25 stimulates sp**  
147 **cleavage and enhances the rate of p17 biogenesis.** As our experiments indicated delayed  
148 processing or ineffective translocation of p25, we sought to define the factors that influence the  
149 trafficking pathway of the HBV precore precursor. The N-terminal pre sequence of p25, which  
150 contains three Cys residues at positions -16, -18, and -23, serves as a sp directing the protein into  
151 the ER (see Fig. 1). Although the signal sequence is unusual considering its reduced  
152 hydrophobicity, it is conserved among hepadnaviruses (Fig. S1). While Cys -7 within the  
153 propeptide sequence is known to stabilize the intrasubunit dimer via a disulfide bond with Cys 61,  
154 the role of the three Cys residues located within the sp sequence had remained unclear. We first  
155 examined whether the p25 maturation process is influenced by changes in redox conditions. Huh7  
156 cells transfected with pCEP HBEM1A were labeled for 30 min with <sup>35</sup>S in the presence or absence  
157 of 5 mM DTT. The cells were harvested and lysates were subjected to immunoprecipitation with



158 anti-core antibody. In Huh7 cells cultivated without a reducing agent, we observed all intracellular  
159 precore forms: p25<sup>P</sup>, p25, and p22. However, in DTT-treated cells, the sp was almost completely  
160 removed, and p22 was predominant (Fig. 2B).

161 Next, we analyzed the contribution of the three Cys residues in the precore precursor sp  
162 sequence to p25 processing. We substituted these Cys residues with alanines (construct pCEP  
163 HBeM1A C-16A, C-18A,C-23A; the resulting protein is denoted HBe3CA) and transfected this  
164 construct into Huh7 cell line, which was labeled for 30 min with <sup>35</sup>S 24 h after transfection. The  
165 autoradiographs of immunoprecipitated proteins (Fig. 2C) indicate that processing of the HBe3CA  
166 unphosphorylated precursor was more effective; we observed only phosphorylated p25<sup>P</sup> and p22  
167 and did not detect any p25. Treatment of these immunoprecipitates with λ-PP resulted in  
168 disappearance of the p25<sup>P</sup> band, further confirming the presence of only the phosphorylated form  
169 of p25 in cells transfected with the HBe3CA construct.

170 To analyze the contribution of the sp Cys residues to the rate of p25 processing and p17  
171 release, we performed pulse/chase experiments with both wt HBe and the HBe3CA mutant. Huh7  
172 cells were isotopically pulse-labeled for 30 min in the presence of <sup>35</sup>S and chased at different time  
173 points. HBV precore-related proteins were immunoprecipitated with anti-core polyclonal antibody  
174 (Fig. 2D). In cells producing wt HBe, the amount of p22 decreased significantly after  
175 approximately 4 h of chase, which corresponded well with increased extracellular p17  
176 concentration at this time point. In cells producing the HBe3CA mutant, p17 secretion was not  
177 impaired, demonstrating that mutation of Cys residues does not interfere with sp function.  
178 Moreover, we did not observe the unprocessed unphosphorylated p25 protein in these cells,  
179 suggesting more efficient sp cleavage than for the wt.

180 To explore the function of the N-terminal sequence of precore precursor in the context of  
181 the whole virus, mutations of Cys -16, -18, and -23 of p25 were introduced into the HBV

182 recombinant cccDNA minichromosome (3CA rcccDNA). After transfection of wt or 3CA  
183 rcccDNAs into HepG2-NTCP cells, the wt and C3A virions were purified from the culture medium.  
184 Subsequently, HepG2-NTCP cells were infected with wt and 3CA HBV virions (MOI = 2000  
185 VGE/cell) and the rate of HBV replication was determined by ELISA on days 0, 3, 6, and 14 post-  
186 infection. Both wt and 3CA viruses were able to infect HepG2-NTCP, but infection with the 3CA  
187 mutant virus yielded higher levels of p17 in the media compared to the wt virus (Fig. 2E). This  
188 implies that 3CA mutation may lead to more efficient maturation and secretion of precore protein.

189         These results indicate a regulatory role for the N-terminal Cys residues in HBV precore  
190 protein maturation that is reflected by the rate of p17 secretion.

191         **Cysteine residues in the sp sequence influence subcellular localization of precore**  
192 **protein.** To determine the localization of individual precore protein forms, we performed crude  
193 subcellular fractionation of HEK 293T cells, which yielded better separation of individual fractions  
194 than Huh7 cells. The cells were transfected with the pCEP HBeM1A or pCEP HBeM1A 3CA  
195 construct and isotopically labeled for 30 min with <sup>35</sup>S. Individual cytosolic, microsomal, and  
196 nuclear fractions of the cell lysates were isolated and analyzed by Western blots using antibodies  
197 against specific organelle markers (Fig. S2). Precore-related proteins were immunoprecipitated  
198 with anti-core polyclonal antibody and visualized by autoradiography. Autoradiographs of HBe  
199 samples showed that unphosphorylated p25 and p22 were preferentially localized in microsomes  
200 (Fig. 3A), again indicating inefficient and likely post-translational sp cleavage. The main difference  
201 between the precore wt and the Cys mutant appeared in the microsomal fraction, in which the  
202 HBe3CA samples contained almost no p25, indicating a very fast and effective N-terminal  
203 truncation process (confirmed in Huh7 cells; see Fig. S3). To determine whether the inefficient  
204 cleavage of wt p25 and its presence in the microsomal fraction is a consequence of a translocation  
205 defect and whether the full-length precursor is only attached to the surface of microsomes, we

206 subjected this fraction to proteinase K (PK) cleavage. A sample with 1% Triton 100 added to  
 207 dissolve all membranes served as a control. After 1 h incubation of microsomes with PK, we still  
 208 detected undigested wt p25, indicating its membrane shielding and functional translocation (Fig  
 209 3B). The phosphorylated p25<sup>P</sup> form was present in both the cytosolic and nuclear fractions (Fig.  
 210 3C), and thus it is tempting to speculate that phosphorylation can stimulate transport of p25 to the  
 211 nucleus.

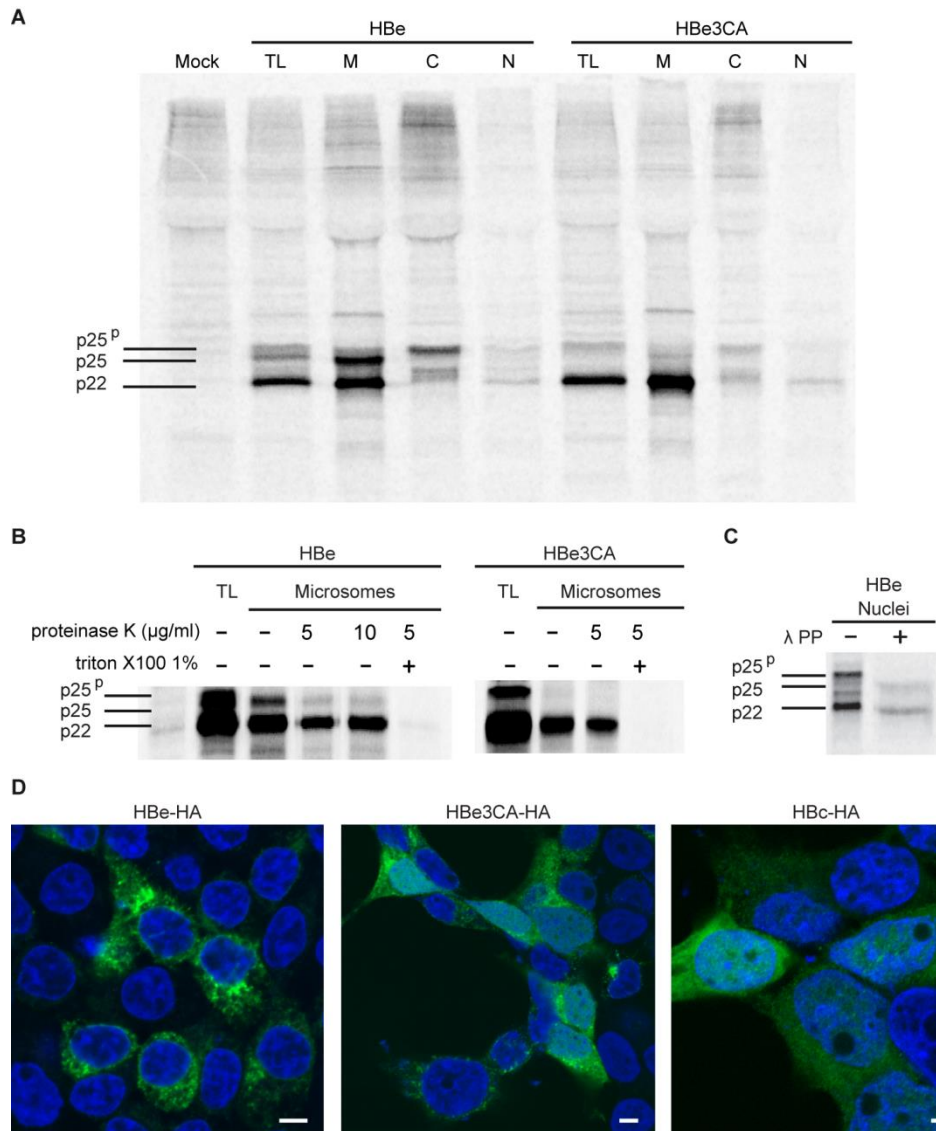

212  
 213 **Fig. 3. Subcellular localization of wt HBe and HBe3CA-derived precore forms.** (A)  
 214 Autoradiograph of <sup>35</sup>S-labeled proteins immunoprecipitated with anti-core antibody. HEK 293T cells

215 producing HBe or HBe3CA proteins were labeled for 30 min, lysed (total lysate, TL), and subjected to  
216 subcellular fractionation. Precore-related proteins from individual fractions representing cytosol (C), nuclei  
217 (N), and microsomes (M) were immunoprecipitated, separated by SDS-PAGE, and visualized by  
218 autoradiography. **(B)** Immunoprecipitated microsomal fractions from HEK 293T cells were treated with  
219 proteinase K and analyzed by autoradiography. **(C)** The immunoprecipitated nuclear fraction from HEK  
220 293T cells was treated with  $\lambda$ -PP separated by SDS-PAGE. The electrophoretic mobility of precore-related  
221 proteins untreated (-) or treated (+) with  $\lambda$ -PP was analyzed by autoradiography. **(D)** Representative  
222 confocal microscopy images of HA-tagged HBe, HBe3CA, and HBc visualized by FITC-conjugated anti-  
223 HA antibody in transfected HEK 293T cells. HBe, HBe3CA, HBc (green) and DAPI (blue). Scale bar  
224 represents 5 $\mu$ m.

225  
226 The subcellular localizations of C-terminally HA-tagged wt HBe, the HBe3CA mutant, and  
227 HBc protein (control) were evaluated by immunofluorescence analysis (IFA) using anti-HA  
228 antibody (Fig. 3D) in transfected HEK 293T cells. While the wt precore protein was localized  
229 exclusively in the cytoplasm and the core protein was distributed between the cytosol and nucleus  
230 with predominant nuclear localization, the HBe3CA mutant displayed a mixed phenotype. We  
231 observed cells with a cytoplasmic phenotype resembling that of wt, as well as cells exhibiting both  
232 a nuclear and cytoplasmic distribution pattern. We assume that the increased level of HBe3CA  
233 mutant in the nucleus is related to a higher intracellular level of p22 resulting from faster sp  
234 processing, which could contribute to the massive retro-translocation from the ER.

235 To examine whether the HBV precore signal peptide can work independently of the rest of  
236 the protein sequence, we prepared constructs of enhanced green fluorescent protein (EGFP, vector  
237 pEGFP N1) N-terminally attached to the leader sequences and propeptide sequences from either  
238 wt p25 or the 3CA mutant [prepro sequence, amino acids (-1) – (-29), resulting constructs pCMV  
239 preproHBe-EGFP and pCMV preproHBe3CA-EGFP]. As a control, we prepared a similar  
240 construct with a leader sequence plus four additional amino acids from the mature part of the human  
241 protein disulfide isomerase PDIA1, an abundant ER resident chaperone (attached sequence

242 MLRRALLCLAVAALVRADAPE, construct pCMV spPDI-EGFP). The subcellular localization  
243 of these constructs in transfected HEK 293T cells was evaluated by confocal microscopy (Fig. S4).  
244 The localization pattern of wt EGFP appeared very dispersive, as the protein migrates by free  
245 diffusion from the cytosol to the nucleus. The phenotypes of the preproHBe-EGFP and  
246 preproHBe3CA-EGFP constructs were similar to that of EGFP, implying that HBV precore sp  
247 (either wt or mutated) is not sufficient for successful ER translocation and that the cooperation of  
248 downstream sequences in this process is likely necessary. In contrast, the pattern of EGFP fused  
249 with the functional PDIA1 leader sequence exhibited cytoplasmic localization in about 50% of  
250 transfected cells. Apparently the efficiency of HBV precore signal sequence alone is not  
251 comparable with that of the common leader signal from an ER-resident protein.

252 Taken together, these data indicate that precore protein translocation is a controlled process,  
253 in which the delay in p25 N-terminal cleavage and thus regulation of the p22 level prevent its  
254 mislocalization within cells. Cys residues in the sp and the weak ability of the leader sequence to  
255 mediate translocation are likely key factors in this sequential HBe maturation.

256 **HBV precore precursor interacts with TRAP.** To identify host proteins potentially  
257 involved in translocation of the HBV precore protein, we performed HBe interactome analysis  
258 using an LC-MS/MS-based proteomics approach. To block HBe secretion and thereby enhance its  
259 detection in cell lysates, we added Brefeldin A, which inhibits protein transport from the ER to  
260 the Golgi complex. HepG2-NTCP cells transfected with a plasmid encoding C-terminally HA-  
261 tagged HBe or HBe3CA were cultivated for 36 h, treated with Brefeldin A for 4 h, and harvested.  
262 Cell lysates were subjected to immunoprecipitation using anti-HA magnetic beads, and recovered  
263 proteins were analyzed by LC-MS/MS for identification and label-free quantification. Triplicates  
264 of HBe (or HBe3CA) and control cell lines allowed application of a Student's *t*-test to statistically  
265 determine the proteins specifically enriched in HBe positive samples. The result of the analysis is

266 shown on the Volcano plot (Fig. S5). Among the proteins enriched in HBe (or HBe3CA) containing  
267 samples we identified the previously described precore interacting partners C1qBP, GRP78/BiP  
268 (13,30), and protein kinase SRPK1, which mediates HBV core phosphorylation (31) (Tab. 1). In  
269 both HBe-HA and HBe3CA-HA samples, we also repeatedly observed peptides derived from the  
270 Sec61 translocon complex and subunits ( $\alpha$ ,  $\beta$ ,  $\delta$ ) of TRAP, an accessory component that triggers  
271 Sec61 channel opening in a substrate-specific manner (Tab. 1) (27). No significant differences were  
272 observed between wt precore and the 3CA mutant with regard to detected co-immunoprecipitated  
273 proteins.

274 Table 1: HBe associated proteins identified by shotgun LC-MS/MS analysis of HBe-HA  
275 immunoprecipitates from HepG2 cells.

276

| Protein       | HBe             | HBe             | CTRL         | CTRL         |
|---------------|-----------------|-----------------|--------------|--------------|
|               | Peptides        | PSMs            | Peptides     | PSMs         |
|               | Exp.1/2/3       | Exp.1/2/3       | Exp.1/2/3    | Exp.1/2/3    |
| <b>HBe-HA</b> | <b>17/13/16</b> | <b>45/35/45</b> | <b>0/0/0</b> | <b>0/0/0</b> |
| C1qBP         | 9/8/9           | 30/23/36        | 0/0/1        | 0/0/1        |
| GRP78/BiP     | 6/5/7           | 10/9/11         | 4/3/0        | 6/4/0        |
| SRPK1         | 3/4/5           | 4/5/7           | 0/0/0        | 0/0/0        |
| Sec61 alpha-1 | 2/1/2           | 5//2/3          | 2/0/1        | 2/0/1        |
| Sec61 alpha-2 | 1/0/1           | 3/0/1           | 0/0/0        | 0/0/0        |
| TRAP alpha    | 2/1/1           | 5//4/4          | 0/1/1        | 0/2/2        |
| TRAP beta     | 2/1/1           | 3/2/1           | 1/0/0        | 1/0/0        |
| TRAP delta    | 1/1/0           | 1/2/0           | 0/0/0        | 0/0/0        |

277

278 (HBe, HBe-HA sample; CTRL, negative control (no HBe) sample; peptides, the number of detected  
279 peptide sequences unique to a protein; PSM, the total number of identified peptide spectra matched for the  
280 protein)

281

282 To evaluate potential interactions between the HBV precore protein and TRAP complex,  
283 we co-transfected HEK 293T cells with the HA-tagged HBe construct and individual C-myc-  
284 tagged TRAP subunits  $\alpha$ ,  $\beta$ ,  $\gamma$ , and  $\delta$  and performed pull-down experiments using anti-HA magnetic  
285 beads followed by Western blot evaluation using anti-c-myc antibody (Fig. 4A). We detected a

286 significant signal corresponding to all four individual TRAP subunits after co-immunoprecipitation  
287 with the HBe construct, indicating mutual interaction between HBV precore and TRAP. In control  
288 samples transfected with mock DNA and individual TRAP subunits, we observed a non-specific  
289 interaction between TRAP  $\beta$  and the magnetic beads; the other three subunits did not display any  
290 nonspecific background. The repeatedly confirmed association between the HBV precore protein  
291 and TRAP complex subunits strongly implies involvement of TRAP in the translocon gating of  
292 p25 protein.

293

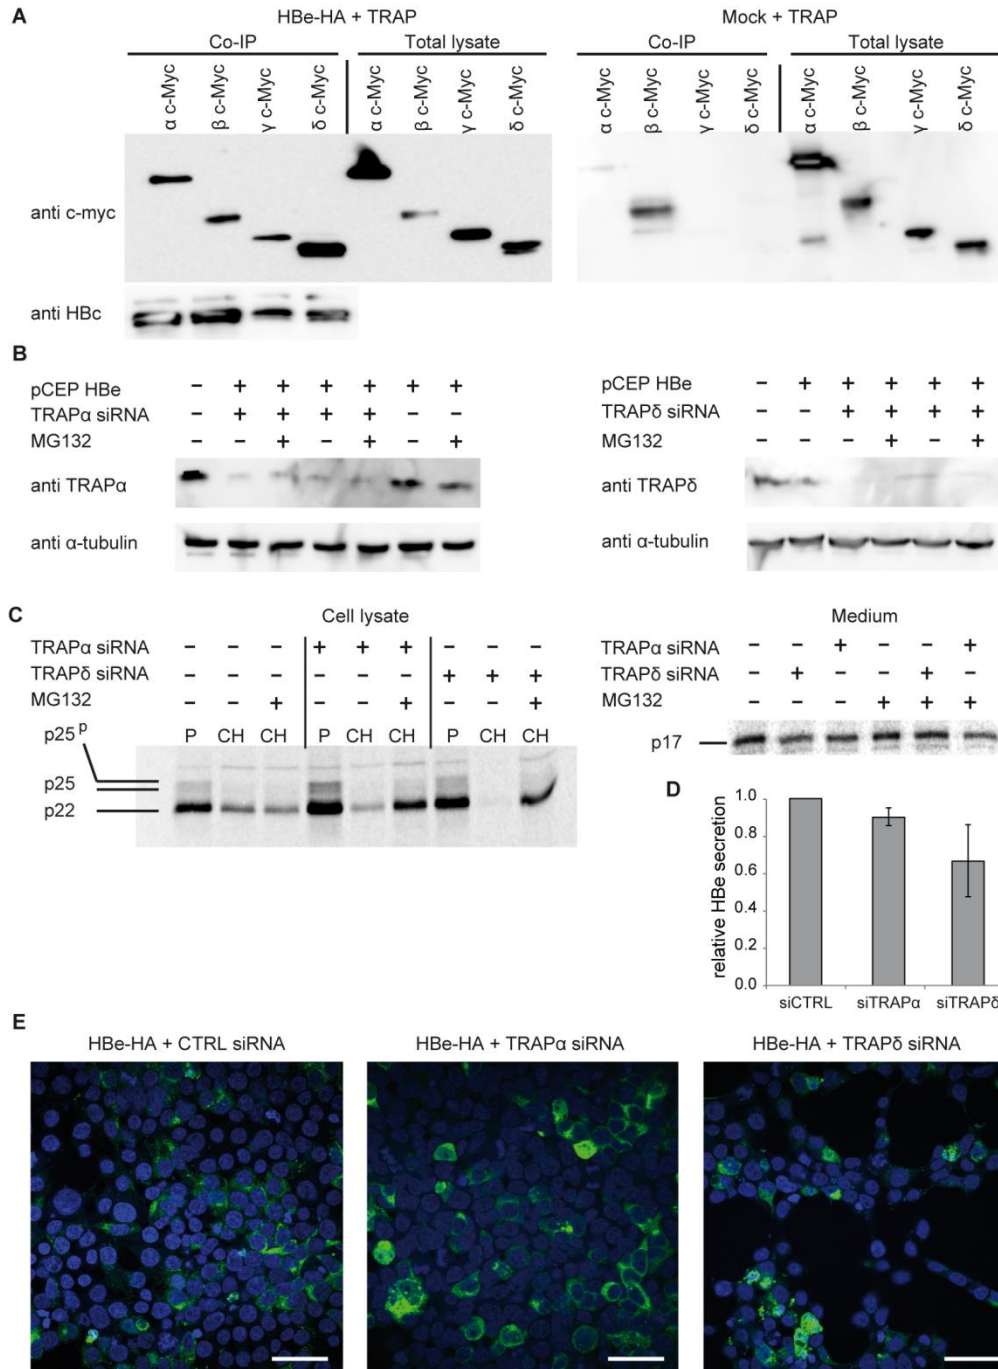

294

295

296 **Fig 4. Co-immunoprecipitation of HBV precore protein with individual TRAP subunits and TRAP**  
 297 **depletion effect on precore stability and translocation. (A)** HEK 293T cells were co-transfected with  
 298 HA-tagged HBe producing construct (or mock DNA) and plasmids expressing individual c-myc tagged  
 299 TRAP subunits. Precore protein was immunoprecipitated with anti-HA magnetic beads and samples were  
 300 analyzed by Western blot using anti c-myc antibody to detect interacting TRAP proteins. **(B)** HEK 293T



301 cells were co-transfected with HBe producing construct and siRNAs targeting either TRAP  $\alpha$  or  $\delta$  genes.  
302 Silencing effect was evaluated by Western blot analysis. (C) Knock down of TRAP decreases efficiency of  
303 HBe secretion. 48 h post-transfection, TRAP-silenced cells were metabolically labeled for 30 min with  $^{35}\text{S}$   
304 (P) and chased for 4 h (CH) with or without addition of the proteasome inhibitor MG132. Cells and media  
305 were harvested and subjected to immunoprecipitation with anti-core antibody. Proteins were separated by  
306 SDS-PAGE and analyzed by autoradiography. (D) The signal intensity of p17 in the medium was quantified  
307 and shown relative to the unsilenced sample. The bars represent averages from three independent  
308 experiments, and error bars indicate the standard deviation. (E) Representative confocal microscopy images  
309 of HA-tagged HBe or HBe3CA in HEK 293T cells depleted for TRAP  $\delta$  subunit visualized by FITC-  
310 conjugated anti-HA antibody. HBe and HBe3CA are shown in green, and DAPI in blue. Scale bar  
311 represents 40 $\mu\text{m}$ .

312

313 **TRAP complex cooperates in the translocation and sequential maturation of HBV**  
314 **precore protein.** To investigate whether the TRAP complex is involved in precore protein  
315 translocation into the ER, siRNA-mediated knockdown of either the  $\alpha$  or  $\delta$  subunit was performed  
316 in HEK 293T cells. Cells were co-transfected with plasmid producing HBe and siRNA targeting  
317 one TRAP subunit ( $\alpha$  or  $\delta$ ). Metabolic labeling followed by a pulse-chase experiment (30 min  
318 pulse, 3 h chase) was performed 48 h after transfection. The efficiency of silencing was evaluated  
319 by Western blot using monoclonal antibodies that recognize the hTRAP  $\alpha$  or  $\delta$  subunit (Fig. 4B).  
320 Cell lysates and collected medium were immunoprecipitated using polyclonal anti-HBV core  
321 antibody. The remarkable effect of TRAP depletion became evident at the intracellular precore  
322 protein level. In cells producing wt precore protein with silencing of either the TRAP  $\alpha$  or  $\delta$   
323 subunits, the signals of p22 and p25 significantly decreased compared to nondepleted cells and  
324 were restored after addition of the proteasome inhibitor MG132. The effect was stronger upon  
325 TRAP  $\delta$  knock down (Fig. 4C). In the medium of cells overexpressing HBV precore with TRAP  
326 silencing, we observed slightly lower levels of mature p17 secretion, again especially in samples

327 with TRAP  $\delta$  depletion (Fig. 4D). Our results indicate that silencing of individual TRAP subunits  
328 promotes degradation of HBe wt, presumably due to ineffective translocation.

329 Next, we analyzed the effect of TRAP depletion on the subcellular distribution of the  
330 precore protein. HEK 293T cells were co-transfected with the HBe-HA producing construct and  
331 either TRAP  $\alpha$ - or  $\delta$ -targeting siRNA and examined by confocal microscopy after  
332 immunofluorescence staining using anti-HA antibody conjugated with FITC (Fig. 4E). In both  
333 TRAP-silenced samples, the typical ER localization pattern of precore protein was disrupted in  
334 fraction of cells. The protein appeared to be distributed between the cytosol and the nucleus,  
335 indicating a certain degree of malfunction in the translocation process.

336 It is evident that the leader sequence of the HBe p25 precursor is weak to mediate an  
337 autonomous translocation into ER and that the assistance of the TRAP complex in conducting  
338 channel gating is indispensable for proper HBV precore subcellular localization and p17  
339 biogenesis.

340 **Silencing of individual TRAP complex subunits in HBV-infected cells reduces the**  
341 **extracellular level of HBe.** To determine whether TRAP complex mediates co-translational  
342 translocation of HBe precursor in HBV-infected hepatocytes, we examined the consequences of  
343 siRNA-mediated knockdown of TRAP subunits in HepG2-NTCP cells. SiRNA-treated HBV-  
344 infected hepatocytes were cultured for 5 days before HBe secretion was determined by ELISA.  
345 Whereas non-targeting siRNA had no effect on HBe secretion following knockdown, siRNAs  
346 targeting the  $\alpha$ ,  $\beta$ , and  $\delta$  TRAP subunits reduced the extracellular level of HBe (Fig. 5A). In  
347 contrast, the level of HBs antigen secreted from TRAP-silenced cells remained comparable to that  
348 from non-silenced cells (Fig. S6A). These results indicate that the stability of TRAP is dependent

349 on the presence of all its components and that the efficiency of HBe secretion is reduced upon  
350 downregulation of TRAP in HBV-infected cells.

351 To exclude the possible cytotoxic effect of individual knockdowns, we analyzed the general  
352 effect of TRAP silencing on cell viability. HepG2-NTCP cells were transfected with individual  
353 siRNAs, and we included 5% DMSO as a positive control. After 5 days of incubation, cell viability  
354 was determined by XTT assay in biological triplicates (Fig. S6B). Other than slightly reduced  
355 metabolic viability in cells treated with TRAP $\delta$  siRNA, no significant changes were observed. The  
356 efficiency of silencing was monitored by RT-qPCR 3 days post-transfection (Fig. S6C).

357 To determine possible differences between HBe and HBe3CA regarding TRAP depletion  
358 in HBV-producing cells, we co-transfected HepG2-NTCP cells with HBV rcccDNA (containing  
359 either HBe or HBe3CA genes) and siRNAs targeting individual TRAP subunits. The resulting level  
360 of mature p17 secretion was evaluated by ELISA after 5 days. In this experimental setup, we  
361 observed reduced HBe levels in the media of TRAP-depleted cells for both wt rcccDNA (Fig. 5B)  
362 and HBe3CA rcccDNA (Fig. 5C).

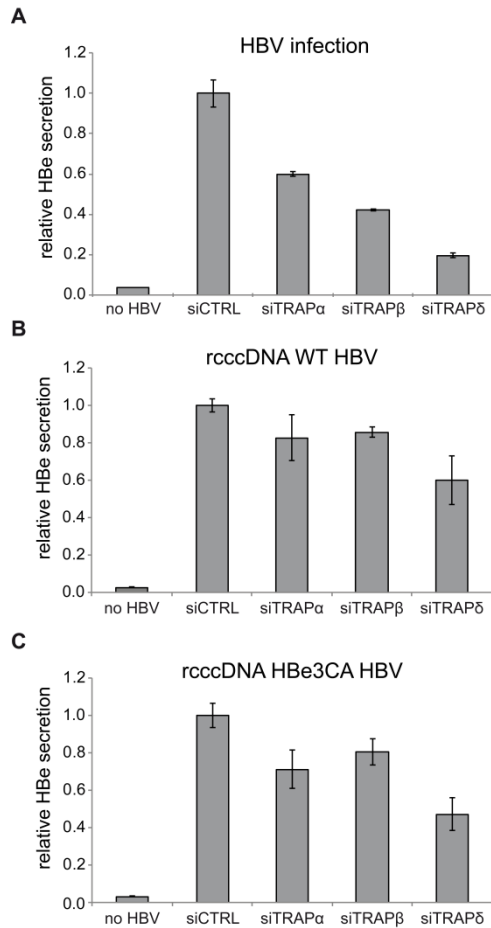

363

364

365 **Fig. 5. The depletion of TRAP subunits downregulates the extracellular level of HBe in both HBV-**  
366 **infected and wt HBV or HBe3CA rcccDNA transfected hepatocytes.** (A) Biological triplicates of  
367 HepG2-NTCP cells were first transfected with siRNA oligonucleotides for 24 h, then infected with HBV at  
368 a MOI of 1,500 VGE/cell for another 96 h before cells and media were harvested. Secreted HBe in media  
369 was quantified by ELISA. TRAP subunit knockdown affects HBe secretion for both wt (B) and mutant  
370 HBe3CA (C) HBV. HepG2-NTCP cells were simultaneously transfected with rcccDNA plasmid coding for  
371 either WT or HBe3CA virus and siRNAs targeting individual TRAP subunits. Secreted HBe levels in media  
372 were quantified by ELISA after 5 days of cultivation.

373

374

375

376

## 377 **Discussion**

378 By closely examining the maturation of the HBe precursor p25, we demonstrate here that  
379 HBV precore protein is present in cells in different forms and is localized to different subcellular  
380 compartments. We identified the unprocessed p25 precursor in microsomes and its phosphorylated  
381 form (p25<sup>P</sup>) in the cytosol and nucleus. We found that the three Cys residues in positions -16, -18,  
382 and -23 play a coordinated regulatory role that contributes to proper p25 processing and  
383 localization. Furthermore, our results illustrate the importance of the host TRAP complex for HBV  
384 precore precursor ER translocation.

385 Phosphorylation and dephosphorylation of HBV core protein plays a crucial role in  
386 assembly, disassembly, and nuclear localization of capsids (32–36). Nuclear localization of HBe  
387 has been associated with two co-dependent nuclear localization signals within the arginine-rich  
388 domain (37,38), which by analogy are also present at the C-terminus of precore (p25 and p22).  
389 Nuclear localization of phosphorylated p22 has been described (29,39); our results revealed that  
390 the phosphorylated version of p25 also is localized in the nuclear fraction of mammalian cells,  
391 although its role in the nucleus has yet to be elucidated. Locarnini and colleagues observed that  
392 precore protein induces repression of many genes in transfected hepatocytes and behaves like a  
393 tumor-suppressing protein with anti-apoptotic activity (17). However, this observation was  
394 presented as a general effect of precore expression in cells, and no particular activity was attributed  
395 to individual forms of precore protein.

396 Factors involved in retaining a significant portion of p25 in the cytoplasm or causing retro-  
397 translocation of p25 from the ER membrane back to the cytosol also remain poorly understood.  
398 Our findings show that addition of a reducing agent (DTT) into cell culture media or mutations of  
399 three Cys residues in the sp sequence accelerate p25 processing and lead to almost complete

400 conversion of p25 to p22. Four cysteines in the N-terminal part of p25 are conserved in all  
401 hepadnaviruses, and these sequences are predicted to be potential zinc fingers. Their function in  
402 the viral life cycle has not been established. Wasenauer *et al.* reported that these Cys residues are  
403 dispensable for mature HBe production (40). In agreement with their data, we found that  
404 replacement of three cysteines in the sp sequence with alanines did not abolish precore maturation.  
405 The sp function of the HBe3CA construct remained unchanged, and the mutated protein was  
406 translocated into the ER. Single-round infectivity assays revealed a slightly higher signal of mature  
407 p17 secreted from HepG2-NTCP cells infected with HBe3CA HBV particles compared to cells  
408 infected with the wt HBV genome. Interestingly, confocal microscopy experiments showed that  
409 Cys residues in the sp are responsible for the proper precore localization pattern and prevent  
410 spreading of precore across the cell in a core-like phenotype. It appears that HBV needs to tightly  
411 regulate the precore precursor maturation process to avoid unfavorable p22 localization and its  
412 eventual interference with core functions. Additionally, the distribution of the dual p25 population  
413 (phosphorylated in cytosol and nucleus, nonphosphorylated in microsomes) must be under some  
414 control mechanism. Several ER-resident proteins, such as calreticulin, have been found to have  
415 another independent role in cytosol, and their segregation between compartments is influenced by  
416 the weak ability of their signal sequences to mediate translocation (41,42). Our results showed that  
417 p25 processing and localization is regulated by the conserved Cys residues within the sp. In the co-  
418 translational pathway, the translocation process is initiated during protein synthesis when the sp is  
419 recognized by SRP. As long as this sequence is sufficiently hydrophobic and helical (so-called  
420 “strong”), it can facilitate translocon opening. The tertiary folding is delayed until the protein exits  
421 the channel and enters the ER lumen [reviewed in (43)]. Domains folded prematurely in the cytosol  
422 inhibit translocation (44,45). Gating of proteins with “weak” signal sequences is postponed, and  
423 their interactions with additional Sec61 accessory proteins such as TRAM, TRAP, Sec62/63, or

424 BiP are needed [reviewed in (46)]. The composition of the sp of HBV precore is unusual and does  
425 not contain a segment of hydrophobic amino acids characteristic of typical leader sequences.  
426 Apparently, this signal is not strong enough to open the translocon channel, and a host chaperone  
427 is employed to mediate successful gating or to stabilize the binary Sec61–p25 complex. This  
428 hypothesis is in agreement with the observation that p25 displays impaired sp cleavage in a non-  
429 mammalian model, possibly caused by a lack of appropriate cellular partners (47). As our data  
430 suggest that p25 sp does not work independently of the rest of the precore protein, additional  
431 downstream sequences are very likely necessary for successful translocation, and we assume that  
432 they cooperate with transmembrane or luminal proteins.

433 Our work establishes TRAP complex as a novel interacting partner participating in p25  
434 translocation. After siRNA-mediated knockdown of TRAP complex, translocation of wt precore  
435 protein precursor is disrupted, and the protein is directed to proteasomal degradation. In HBV-  
436 infected hepatocytes, this is reflected by significantly decreased production of secreted p17. Several  
437 signal sequences, including those of the prion protein and preproinsulin, require TRAP complex  
438 for successful conducting channel opening (48,49). In addition to low hydrophobicity, a high GP  
439 content has been proposed as a common feature for most such signal sequences (27). Interestingly,  
440 the sp of HBV p25 fulfils only the condition of a reduced number of hydrophobic residues. Instead  
441 of a GP-rich patch, its primary structure includes three conserved cysteines, which seem to be  
442 involved in autoregulation of HBe biogenesis. Their precise role and possible participation in  
443 tertiary structure still need to be elucidated, but evidently, they are not indispensable for TRAP  
444 interaction and facilitation of translocon gating. Instead, they are more likely responsible for  
445 moderation of the translocation process and thus its regulation.

446 In summary, we present evidence that the three conserved Cys residues in the sp of the  
447 HBV precore precursor p25 serve as an auto-regulatory factor controlling proper progression of  
448 the precore translocation process and therefore preventing mislocalization of precore. We also  
449 identified TRAP complex as a host factor required for successful translocation of p25 and for  
450 support of mature p17 biogenesis.

451

## 452 **Experimental procedures**

453 **DNA constructs.** HBV precore and core coding sequences were derived from the HBV  
454 genome-containing plasmid pHBV4.1 obtained from Dr. Huiling Yang (Gilead Sciences, Foster  
455 City, CA, USA). The HBV core protein coding region was amplified using the forward primer 5'-  
456 ATCATAAGCTTACCATGGACATCGACCCTTATAAAG-3' and reverse primer 5'-  
457 TAGATGGTACCCTAACATTGAGGTTCCCGAG-3' and subcloned into the pcDNA3.1 vector  
458 (Clontech) via *HindIII* and *KpnI* restriction sites, giving rise to construct pcDNA3 HBc. The  
459 precore precursor gene was amplified using the forward primer 5'-  
460 ATCTAAAGCTTACCATGCAACTTTTTACCTCT-3' and reverse primer 5'-  
461 TAGATGGATCCCTAACATTGAGGTTCCCGAG-3' and introduced into the pCEP vector  
462 (Invitrogen) via *HindIII* and *BamHI* restriction sites. To remove the initiating ATG codon for the  
463 HBV core protein, a M1A mutation was introduced by site-directed Pfu mutagenesis using  
464 mutagenic primers 5'-TGGCTTTGGGGCGCCGACATTGACC-3' and 5'-  
465 GGTC AATGTCGGCGCCCCAAAGCCA-3', giving rise to the construct pCEP HBeM1A.

466 The C-terminal HA tag was introduced into the pCEPHBeM1A construct using the reverse  
467 primer 5'-  
468 AGCTCGGATCCTCAAGCGTAGTCCGGGACGTCGTAAGGGTAACATTGAGGTTCCCGA



469 G-3'. The following forward primer was used for mutation of three cysteines at positions -23, -18  
470 and -16 of the precore signal peptide sequence to give rise to construct pCEP HBeM1A3CA: 5'-  
471 ATCTAAAGCTTACCATGCAACTTTTTACCTCGCCCTAATCATCTCTGCTTCAGCTCC  
472 TACTGTTCAAGC-3'.

473 The minicircle-producing plasmid for wt HBV recombinant cccDNA (*wt rcccDNA*) was  
474 kindly provided by Dr. Ping Chen (Shenzhen Institutes of Advanced Technology, Chinese  
475 Academy of Sciences, Shenzhen, China) (50). The rcccDNA plasmid designated as C3A rcccDNA,  
476 which carries a triple C-to-A mutation in the pre-core ORF at positions -16, -18, and -23, was  
477 generated by site-directed mutagenesis (QuikChange II XL Site-Directed Mutagenesis Kit, Agilent  
478 Technologies) with three subsequent rounds of PCR using the following primers: C1A-F, 5'-  
479 GCGATGCAACTTTTTACCTCGCCCTAATCATCTCTTGTTCATG-3'; C1A-R, 5'-  
480 CATGAACAAGAGATGATTAGGGCGAGGTGAAAAAGTTGCATCGC-3'; C2A-F, 5'-  
481 CCATGCAACTTTTTACCTCGCTCTAATCATCTCTGCTTCAG-3'; C2A-R, 5'-  
482 CTGAAGCAGAGATGATTAGAGCGAGGTGAAAAAGTTGCATGG-3'; C3A-F, 5'-  
483 CAACTTTTTACCTCGCCCTAATCATCTCTGCTTCAGCTCCTACTGTTCAAGCC-3';  
484 C3A-R, 5'-  
485 GGCTTGAACAGTAGGAGCTGAAGCAGAGATGATTAGGGCGAGGTGAAAAAGTTG-3'.

486 Constructs of individual c-myc tagged human TRAP subunits ( $\alpha$ ,  $\beta$ ,  $\delta$ ) under the CMV  
487 promoter were purchased from OriGene Technologies (#RC202408, #RC213580, #RC201079, #  
488 C201593).

489 **rcccDNA production and purification.** The wt and C3A mutant rcccDNA plasmids were  
490 transformed into *E. coli* strain ZYCY10P3S2T, and the rcccDNA was isolated using the MC-Easy  
491 minicircle production kit (System Biosciences) according to the manufacturer's recommendations.

492           **siRNA.** SiRNAs targeting individual hTRAP subunits ( $\alpha$ ,  $\beta$ ,  $\gamma$ ,  $\delta$ ) were purchased from  
493 Santa Cruz Biotechnology (SCBT, t# sc-63153, #sc-63147, #sc-63148, #sc-63149).

494           **Antibodies.** Rabbit polyclonal anti-HBV core protein antiserum was obtained after  
495 immunization of three animals with 1.4 mg/ml purified denatured (boiling in 1% SDS, 0.1 M DTT)  
496 HBV core protein produced in *E. coli* (Moravian Biotech).

497           Mouse monoclonal antibodies against individual TRAP subunits were purchased from  
498 SCBT (#sc-373916, #sc-517428, #sc-376706) .

499           **Cells.** HEK 293T (human embryonic kidney cell line, ATCC) and Huh7 cells  
500 (differentiated hepatocyte-derived carcinoma cell line, Japanese Collection of Research  
501 Bioresources Cell Bank) were cultured in Dulbecco's Modified Eagle Medium (DMEM)  
502 supplemented with 10% fetal bovine serum (FBS, VWR) and an antibiotic mixture  
503 (penicillin/streptomycin (PenStrep), Sigma-Aldrich) at 37 °C in a 5% CO<sub>2</sub> atmosphere.

504           HepG2-NTCP, a HepG2 human liver cancer cell line stably transfected with the human  
505 HBV entry receptor (sodium taurocholate co-transporting polypeptide, NTCP), was obtained from  
506 Dr. Stephan Urban (Heidelberg University Hospital, Heidelberg, Germany). The cells were  
507 cultured in DMEM supplemented with 10% FBS, the antibiotic mixture (PenStrep), and puromycin  
508 (0.05 mg/mL, Sigma-Aldrich) at 37 °C in a 5% CO<sub>2</sub> atmosphere.

509           **Cell proliferation assay.** Labeling reagents XTT (sodium 3'-[1- (phenylaminocarbonyl)-  
510 3,4- tetrazolium]-bis (4-methoxy6-nitro) benzene sulfonic acid hydrate) and PMS (N-methyl  
511 dibenzopyrazine methyl sulfate) were purchased from Sigma-Aldrich. Assay was performed  
512 according to protocol in Cell proliferation kit II (XTT) (Roche, #11 465 015 001).

513           **Transfection.** According to the respective manufacturer's instructions, plasmid DNA was  
514 introduced into HepG2-NTCP cells using Lipofectamine™ 3000 transfection reagent  
515 (ThermoFisher Scientific), Huh7 cells were transfected with GenJet™ (SigmaGen Laboratories),

516 and HEK 293T cells were transfected with a 1:3 ratio of DNA:polyethylenimine (PEI, 25 kDa  
517 linear, Sigma-Aldrich). Transfection of siRNA was performed using X-tremeGENE siRNA  
518 Transfection Reagent (Roche) for HEK 293T cells and Lipofectamine RNAiMAX Transfection  
519 Reagent (ThermoFisher Scientific) for HepG2-NTCP cells, according to the manufacturers'  
520 protocols.

521 **RT-qPCR.** Intracellular levels of mRNA for TRAP complex subunits were estimated by  
522 RT-qPCR using Luna Universal One-Step RT-qPCR Kit (NEB) following total RNA isolation with  
523 RNeasy Mini Kit (Qiagen). Primers targeting TRAP $\alpha$ ,  $\beta$ , and  $\delta$  mRNAs were purchased from  
524 SCBT (#sc-63153-PR, #sc-63147-PR, #sc-63148-PR). Samples were analyzed as technical  
525 duplicates.

526  
527 **Metabolic labeling and pulse/chase analysis.** Confluent Huh7 or HEK 293T cells grown  
528 on 60 mm dishes were starved 18 h post-transfection with DMEM lacking cysteine and methionine  
529 for 15 min, pulsed for 30 min with 10  $\mu$ Ci [ $^{35}$ S]-labeling mix (Trans $^{35}$ S-Label<sup>TM</sup> MP Biomedicals)  
530 and subsequently chased with complete DMEM medium for the desired time periods. Harvested  
531 cells were lysed in lysis buffer A (1% Triton X100, 50 mM NaCl, 1% deoxycholate, 25 mM Tris,  
532 pH 8) containing 1 mM PMSF and Complete<sup>TM</sup> EDTA free protease inhibitor cocktail (Roche).  
533 Nuclei were removed by centrifugation for 1 min at 6,000 rpm, and immunoprecipitation of the  
534 precleared lysate was performed using polyclonal anti-core antibody and protein A sepharose beads  
535 (Invitrogen). Immunoprecipitated complexes were washed twice in buffer B (1% Triton X100, 50  
536 mM NaCl, 1% deoxycholate, 0.1% SDS, 25 mM Tris, pH 8) and once in 20 mM Tris, pH 8.  
537 Sepharose beads were resuspended in SDS-PAGE loading buffer and boiled for 5 min. Proteins

538 were separated on 15% SDS-PAGE and subjected to phosphorimager analysis. Signal intensity  
539 was evaluated using QuantImage software (GE Healthcare).

540 **Immunofluorescence analysis.** Transiently transfected HEK 293T cells were grown on  
541 22-mm glass coverslips for 24 h, briefly washed with phosphate-buffered saline (PBS), and fixed  
542 with 4% paraformaldehyde in PBS for 30 min at room temperature. Fixed cells were washed with  
543 PBS and permeabilized with 0.2% Triton X-100 in PBS for 30 min. Permeabilized cells were  
544 immunostained in PBS, 0.2% Triton X-100, 10% FBS for 1 h using anti-HA antibody conjugated  
545 with FITC (Sigma-Aldrich, #H7411). The cells were washed three times for 10 min with 0.2%  
546 Triton X-100 in PBS. The immunostained coverslips were mounted on slides in ProLong Diamond  
547 Antifade Mountant with DAPI (ThermoFisher Scientific). Images were acquired with a three-  
548 dimensional Zeiss LSM 780 microscopy system (Carl Zeiss) using a 63× oil objective with a  
549 numerical aperture of 1.4. Images were collected with a pinhole at 0.7 μm diameter (1 Airy unit),  
550 averaged four times, and processed with ZEN 2011 software (Carl Zeiss).

551 **Crude subcellular fractionation.** Fractionation was performed according to the protocol  
552 described by Holden and Horton (51) with slight modifications. Transfected cells grown in 100-  
553 mm plates were labeled for 30 min with <sup>35</sup>S and subsequently washed with PBS and detached with  
554 1 ml trypsin. Trypsin was quenched by addition of 2 ml ice-cold complete DMEM media with 10%  
555 FBS. Cells were centrifuged for 1 min at 4 °C and 1,000 rpm. Supernatant was aspirated and cells  
556 were washed with ice-cold PBS. Collected cells were resuspended in 5 ml ice-cold lysis buffer 1  
557 [150 mM NaCl, 50 mM HEPES, pH 7.4, 25 μg/ml digitonin (Sigma-Aldrich)], incubated for 10  
558 min at 4 °C, and centrifuged for 10 min at 10,000 rpm (step 1). Supernatant was mixed with 500  
559 μl TritonX 114, kept for 1 h on ice, heated for 3 min at 37 °C, and centrifuged for 3 min at 3,000 g  
560 at room temperature. The upper aqueous phase contained the purified cytosolic fraction. The pellet  
561 from step 1 was washed in cold PBS, resuspended in 5 ml buffer 2 (150 mM NaCl, 50 mM HEPES,

562 pH 7.4, 1% NP40), incubated for 30 min on ice, and centrifuged for 10 min at 2,000 g. The resulting  
563 supernatant contained the microsomal fraction. The pellet was resuspended in 2 ml buffer 3 [150  
564 mM NaCl, 50 mM HEPES, pH 7.4, 0.1% SDS, 0.5% sodium deoxycholate, 1 U/ml benzonase  
565 (Sigma-Aldrich)], kept for 30 min on ice, and centrifuged for 1 min at 6,000 rpm. The supernatant  
566 from this step contained the nuclear fraction. All fractions were examined on Western blots using  
567 polyclonal antibodies against individual organelle markers: for the cytosolic fraction, anti- $\alpha$  tubulin  
568 antibody (Sigma-Aldrich, #SAB3501071); for the microsomal fraction, anti-PDI antibody (Sigma-  
569 Aldrich, #P7496); and for the nuclear fraction, anti-histone H3 antibody (Millipore, #07-690). HBV  
570 proteins were immunoprecipitated as described above.

571 **Co-immunoprecipitation and pull down experiments.** Cells co-transfected with either  
572 HBe-HA or HBe3CA-HA constructs and DNA encoding individual TRAP c-myc tagged subunits  
573 were lysed 48 h post transfection for 1 h in Co-IP buffer (50 mM HEPES, 100 mM NaCl, 10%  
574 glycerol, 0.5% DOC, pH 7.9) supplemented with Complete™ EDTA free protease inhibitor  
575 cocktail (Roche). Lysates were cleared by centrifugation at 15,000g for 10 min and subjected to  
576 immunoprecipitation using anti-HA magnetic beads for 2 h at 4 °C. Collected beads were washed  
577 by Co-IP buffer without DOC. Samples were boiled in 2x sample buffer for 5 min to elute the  
578 proteins and analyzed by SDS-PAGE followed by Western blot using anti c-myc antibody (Sigma-  
579 Aldrich, #C3956).

580 **Liquid chromatography-tandem mass spectrometry analysis (LC-MS/MS).** Detailed sample  
581 preparation has been described previously (52). Briefly, HBe-HA producing cells were treated for  
582 4 h with Brefeldin A (5 $\mu$ g/mL, Sigma-Aldrich) and harvested in lysis buffer containing 50 mM  
583 Hepes, 100 mM NaCl, 10% glycerol, 0.5% Nonidet P40, pH 7.9. HA-tagged proteins were  
584 immunoprecipitated using anti-HA beads, washed, eluted by HA peptide (0.5 mg/mL), and  
585 fragmented using chymotrypsin. The resulting peptides were separated on an UltiMate 3000

586 RSLCnano system (Thermo Fisher Scientific) coupled to a Mass Spectrometer Orbitrap Fusion  
587 Lumos (Thermo Fisher Scientific). The peptides were trapped and desalted with 2% acetonitrile in  
588 0.1% formic acid at a flow rate of 30  $\mu$ l/min on an Acclaim PepMap100 column [5  $\mu$ m, 5 mm by  
589 300- $\mu$ m internal diameter (ID); Thermo Fisher Scientific]. Eluted peptides were separated using an  
590 Acclaim PepMap100 analytical column (2  $\mu$ m, 50-cm by 75- $\mu$ m ID; ThermoFisher Scientific). The  
591 125-min elution gradient at a constant flow rate of 300 nl/min was set to 5% phase B (0.1% formic  
592 acid in 99.9% acetonitrile) and 95% phase A (0.1% formic acid) for the first 1 min. Then, the  
593 content of acetonitrile was increased gradually. The orbitrap mass range was set from m/z 350 to  
594 2000 in MS mode, and the instrument acquired fragmentation spectra for ions of m/z 100 to 2000.  
595 A Proteome Discoverer 2.4 (ThermoFisher Scientific) was used for peptide and protein  
596 identification using Sequest and Amanda as search engines and databases of sequences of HA-  
597 tagged HBe or HBe3CA, Swiss-Prot human proteins (downloaded on 15 February 2016), and  
598 common contaminants. The data were also searched with MaxQuant (version 1.6.3.4, Max-Planck-  
599 Institute of Biochemistry, Planegg, Germany) and the same set of protein databases to obtain  
600 peptide and protein intensities applied at the label-free quantification (LFQ) step. Perseus software  
601 (version 1.650, Max-Planck-Institute of Biochemistry, Planegg, Germany) was used to perform  
602 LFQ comparison of three biological replicates of HA-tagged HBe (or HBe3CA) cells and three  
603 biological replicates of cells transfected with empty vector. The data were processed to compare  
604 the abundance of individual proteins by statistical tests in form of Student's *t*-test and resulted in  
605 Volcano plot comparing the statistical significance and proteins abundance difference (Fold  
606 change).

607 **HBV particle purification.** HBV virions were produced in HepG2-NTCP cells transfected  
608 with wt and C3A rcccDNA, as previously described (54). Briefly, rcccDNA for *wt* and mutant  
609 precore were transfected in triplicate into HepG2-NTCP cells using Lipofectamine 3000

610 (ThermoFisher Scientific). The culture medium of transfected cells was collected every three to  
611 four days for duration of 30 days. HBV particles were precipitated from clarified cell supernatants  
612 by overnight incubation in 6% polyethylene glycol 8000 (PEG 8000) and were then concentrated  
613 by centrifugation at 4 °C for 90 min at 14,000 x g. The precipitated virions were re-suspended in  
614 complete DMEM supplemented with 10% FBS. HBV titers were determined by quantitative PCR  
615 (qPCR) using primers specific for HBV DNA: HBV-F, 5'-AGAGGACTCTTGGACTCTCTGC-  
616 3'; HBV-R, 5'-CTCCCAGTCTTTAAACAAACAGTC-3'; and the probe pHBV 5'-  
617 [FAM]TCAACGACCGACCTT[BHQ1]-3'. The qPCR reactions were performed with gb Elite  
618 PCR Master Mix (Generi Biotech) and TaqMan probe.

619 **HBV infection and analysis of HBeAg and HBsAg by ELISA.** HepG2-NTCP cells were  
620 infected with *wt* and C3A mutant HBV in a 12-well plate format. The MOI was 2000 viral genome  
621 equivalents per cell. Infection was performed overnight in the presence of 4% PEG8000, 2.5%  
622 DMSO, and 3% FBS. The following day, the cells were washed three times with PBS and  
623 supplemented with fresh DMEM containing 2.5% DMSO and 3% FBS. The progress of HBV  
624 replication was checked by evaluating the titers of HBe and HBs antigens in culture supernatants  
625 using a commercial ELISA kit (Bioneovan). Day 0 was defined as the time point after the viral  
626 inoculum was washed away and the fresh medium was added to cells.

627  
628 **Data availability**The mass spectrometry proteomics data have been deposited to the  
629 ProteomeXchange Consortium via the PRIDE (53) partner repository with the dataset  
630 identifier PXD025430 and 10.6019/PXD025430.

631 **Username:** [reviewer\\_pxd025430@ebi.ac.uk](mailto:reviewer_pxd025430@ebi.ac.uk)

632 **Password:** hIAHH1G3

633

634 **Supporting information**

635 This article contains supporting information

636

637 **Acknowledgement**

638 We thank Romana Cubínková for excellent technical support.

639

640 **Funding**

641 This work was supported by the European Regional Development Fund; OP RDE; Project No.

642 CZ.02.1.01/0.0/0.0/16\_019/0000729 and by RVO project 61388963.

643

644 **Author contributions**

645 Conceptualization, H.Z. and I.P.; Investigation, H.Z., A.Z., J.H., and B.L.; Formal analysis, H.Z.,

646 A.Z., B.L., M.H., A.K., and J.W.; Writing – original draft, H.Z., A.Z, and B.L.; Writing – review

647 & editing, J.W. and I.P.; Funding acquisition, J.W. and I.P.

648

649 **Declaration of interests**

650 The authors declare no competing interests.

651

652 **References**

653

654 1. Ou JH, Laub O, Rutter WJ. Hepatitis B virus gene function: the precore region targets the

655 core antigen to cellular membranes and causes the secretion of the e antigen. Proc Natl

656 Acad Sci U S A. 1986 Mar;83(6):1578–82.

657 2. DiMattia MA, Watts NR, Stahl SJ, Grimes JM, Steven AC, Stuart DI, et al. Antigenic



- 658 switching of hepatitis B virus by alternative dimerization of the capsid protein. *Structure*.  
659 2013 Jan 8;21(1):133–42.
- 660 3. Nassal M, Rieger A. An intramolecular disulfide bridge between Cys-7 and Cys61  
661 determines the structure of the secretory core gene product (e antigen) of hepatitis B virus.  
662 *J Virol*. 1993 Jul;67(7):4307–15.
- 663 4. Selzer L, Katen SP, Zlotnick A. The hepatitis B virus core protein intradimer interface  
664 modulates capsid assembly and stability. *Biochemistry [Internet]*. 2014 Sep  
665 2;53(34):5496–504.
- 666 5. Jean-Jean O, Salhi S, Carlier D, Elie C, De Recondo AM, Rossignol JM. Biosynthesis of  
667 hepatitis B virus e antigen: directed mutagenesis of the putative aspartyl protease site. *J*  
668 *Virol*. 1989 Dec;63(12):5497–500.
- 669 6. Standring DN, Ou JH, Masiarz FR, Rutter WJ. A signal peptide encoded within the  
670 precore region of hepatitis B virus directs the secretion of a heterogeneous population of e  
671 antigens in *Xenopus* oocytes. *Proc Natl Acad Sci U S A*. 1988 Nov;85(22):8405–9.
- 672 7. Ito K, Kim K-H, Lok AS-F, Tong S. Characterization of genotype-specific carboxyl-  
673 terminal cleavage sites of hepatitis B virus e antigen precursor and identification of furin  
674 as the candidate enzyme. *J Virol*. 2009 Apr;83(8):3507–17.
- 675 8. Messageot F, Salhi S, Eon P, Rossignol J. Proteolytic Processing of the Hepatitis B Virus e  
676 Antigen Precursor. *J Biol Chem*. 2003 Jan;278(2):891–5.
- 677 9. Chen MT, Billaud J-N, Sällberg M, Guidotti LG, Chisari F V, Jones J, et al. A function of  
678 the hepatitis B virus precore protein is to regulate the immune response to the core antigen.  
679 *Proc Natl Acad Sci U S A*. 2004 Oct 12;101(41):14913–8.
- 680 10. Riordan SM, Skinner N, Kurtovic J, Locarnini S, Visvanathan K. Reduced expression of  
681 toll-like receptor 2 on peripheral monocytes in patients with chronic hepatitis B. *Clin*

- 682 Vaccine Immunol. 2006 Aug;13(8):972–4.
- 683 11. Visvanathan K, Skinner NA, Thompson AJ V, Riordan SM, Sozzi V, Edwards R, et al.  
684 Regulation of Toll-like receptor-2 expression in chronic hepatitis B by the precore protein.  
685 Hepatology. 2007 Jan;45(1):102–10.
- 686 12. Lang T, Lo C, Skinner N, Locarnini S, Visvanathan K, Mansell A. The hepatitis B e  
687 antigen (HBeAg) targets and suppresses activation of the toll-like receptor signaling  
688 pathway. J Hepatol. 2011 Oct;55(4):762–9.
- 689 13. Duriez M, Rossigno JM, Sitterlin D. The hepatitis B virus precore protein is  
690 retrotransported from endoplasmic reticulum (ER) to cytosol through the ER-associated  
691 degradation pathway. J Biol Chem. 2008;283(47):32352–60.
- 692 14. Ou JH, Yeh CT, Yen TS. Transport of hepatitis B virus precore protein into the nucleus  
693 after cleavage of its signal peptide. J Virol. 1989 Dec;63(12):5238–43.
- 694 15. Garcia PD, Ou JH, Rutter WJ, Walter P. Targeting of the hepatitis B virus precore protein  
695 to the endoplasmic reticulum membrane: after signal peptide cleavage translocation can be  
696 aborted and the product released into the cytoplasm. J Cell Biol. 1988 Apr;106(4):1093–  
697 104.
- 698 16. Scaglioni PP, Melegari M, Wands JR. Biologic properties of hepatitis B viral genomes  
699 with mutations in the precore promoter and precore open reading frame. Virology.  
700 1997;233(2):374–81.
- 701 17. Locarnini S, Shaw T, Dean J, Colledge D, Thompson A, Li K, et al. Cellular response to  
702 conditional expression of the hepatitis B virus precore and core proteins in cultured  
703 hepatoma (Huh-7) cells. J Clin Virol. 2005 Feb;32(2):113–21.
- 704 18. Inoue J, Krueger EW, Chen J, Cao H, Ninomiya M, McNiven MA. HBV secretion is  
705 regulated through the activation of endocytic and autophagic compartments mediated by

- 706 Rab7 stimulation. *J Cell Sci.* 2015 May 1;128(9):1696–706.
- 707 19. Liu D, Cui L, Wang Y, Yang G, He J, Hao R, et al. Hepatitis B e antigen and its precursors  
708 promote the progress of hepatocellular carcinoma by interacting with NUMB and  
709 decreasing p53 activity. *Hepatology.* 2016 Aug;64(2):390–404.
- 710 20. Mitra B, Wang J, Kim ES, Mao R, Dong M, Liu Y, et al. Hepatitis B Virus Precore Protein  
711 p22 Inhibits Alpha Interferon Signaling by Blocking STAT Nuclear Translocation. *J Virol.*  
712 2019 Apr;93(13):e00196-19..
- 713 21. Lang S, Pfeffer S, Lee PH, Cavalié A, Helms V, Förster F, et al. An update on Sec 61  
714 channel functions, mechanisms, and related diseases. *Front Physiol.* 2017 Nov;8:1–22.
- 715 22. Alder NN, Shen Y, Brodsky JL, Hendershot LM, Johnson AE. The molecular mechanisms  
716 underlying BiP-mediated gating of the Sec61 translocon of the endoplasmic reticulum. *J*  
717 *Cell Biol.* 2005 Jan;168(3):389–99.
- 718 23. Hamman BD, Hendershot LM, Johnson AE. BiP maintains the permeability barrier of the  
719 ER membrane by sealing the luminal end of the translocon pore before and early in  
720 translocation. *Cell.* 1998 Mar;92(6):747–58.
- 721 24. Haßdenteufel S, Johnson N, Paton AW, Paton JC, High S, Zimmermann R. Chaperone-  
722 Mediated Sec61 Channel Gating during ER Import of Small Precursor Proteins Overcomes  
723 Sec61 Inhibitor-Reinforced Energy Barrier. *Cell Rep.* 2018 May;23(5):1373–86.
- 724 25. Pfeffer S, Burbaum L, Unverdorben P, Pech M, Chen Y, Zimmermann R, et al. Structure  
725 of the native Sec61 protein-conducting channel. *Nat Commun.* 2015 Sep 28;6:8403.
- 726 26. Hartmann E, Görlich D, Kostka S, Otto A, Kraft R, Knespel S, et al. A tetrameric complex  
727 of membrane proteins in the endoplasmic reticulum. *Eur J Biochem.* 1993;214(2):375–81.
- 728 27. Nguyen D, Stutz R, Schorr S, Lang S, Pfeffer S, Freeze HH, et al. Proteomics reveals  
729 signal peptide features determining the client specificity in human TRAP-dependent ER

- 730 protein import. *Nat Commun.* 2018 Dec;9(1).
- 731 28. Fons RD, Bogert BA, Hegde RS. Substrate-specific function of the translocon-associated  
732 protein complex during translocation across the ER membrane. *J Cell Biol.* 2003  
733 Feb;160(4):529–39.
- 734 29. Yeh CT, Ou JH. Phosphorylation of hepatitis B virus precore and core proteins. *J Virol.*  
735 1991 May;65(5):2327–31.
- 736 30. Lainé S, Thouard A, Derancourt J, Kress M, Sitterlin D, Rossignol J-M. In Vitro and In  
737 Vivo Interactions between the Hepatitis B Virus Protein P22 and the Cellular Protein  
738 gC1qR. *J Virol.* 2003 Dec 1;77(23):12875–80.
- 739 31. Heger-Stevic J, Zimmermann P, Lecoq L, Böttcher B, Nassal M. Hepatitis B virus core  
740 protein phosphorylation: Identification of the SRPK1 target sites and impact of their  
741 occupancy on RNA binding and capsid structure. *PLoS Pathog.* 2018 Dec 1;14(12).
- 742 32. Ludgate L, Adams C, Hu J. Phosphorylation State-Dependent Interactions of  
743 Hepadnavirus Core Protein with Host Factors. Ryu W-S, editor. *PLoS One.* 2011 Dec  
744 22;6(12):e29566.
- 745 33. Selzer L, Kant R, Wang JC-Y, Bothner B, Zlotnick A. Hepatitis B Virus Core Protein  
746 Phosphorylation Sites Affect Capsid Stability and Transient Exposure of the C-terminal  
747 Domain. *J Biol Chem.* 2015 Nov 20;290(47):28584–93.
- 748 34. Wittkop L, Schwarz A, Cassany A, Grün-Bernhard S, Delaleau M, Rabe B, et al.  
749 Inhibition of protein kinase C phosphorylation of hepatitis B virus capsids inhibits virion  
750 formation and causes intracellular capsid accumulation. *Cell Microbiol.* 2010 Jan  
751 26;12(7):962–75.
- 752 35. Liao W, Ou JH. Phosphorylation and nuclear localization of the hepatitis B virus core  
753 protein: significance of serine in the three repeated SPRRR motifs. *J Virol.* 1995

- 754 Feb;69(2):1025–9.
- 755 36. Rabe B, Vlachou A, Pante N, Helenius A, Kann M. Nuclear import of hepatitis B virus  
756 capsids and release of the viral genome. *Proc Natl Acad Sci*. 2003 Aug;100(17):9849–54.
- 757 37. Lubyova B, Hodek J, Zabransky A, Prouzova H, Hubalek M, Hirsch I, et al. PRMT5: A  
758 novel regulator of Hepatitis B virus replication and an arginine methylase of HBV core.  
759 *PLoS One*. 2017 Oct;12(10):e0186982.
- 760 38. Li HC, Huang EY, Su PY, Wu SY, Yang CC, Lin YS, et al. Nuclear export and import of  
761 human hepatitis B virus capsid protein and particles. *PLoS Pathog*. 2010 Oct;6(10).
- 762 39. Yeh CT, Hong LH, Ou JH, Chu CM, Liaw YF. Characterization of nuclear localization of  
763 a hepatitis B virus precore protein derivative P22. *Arch Virol*. 1996;141(3–4):425–38.
- 764 40. Wasenauer G, Köck J, Schlicht HJ. A cysteine and a hydrophobic sequence in the  
765 noncleaved portion of the pre-C leader peptide determine the biophysical properties of the  
766 secretory core protein (HBe protein) of human hepatitis B virus. *J Virol*. 1992  
767 Sep;66(9):5338–46.
- 768 41. Shaffer KL, Sharma A, Snapp EL, Hegde RS. Regulation of protein compartmentalization  
769 expands the diversity of protein function. *Dev Cell*. 2005 Oct;9(4):545–54.
- 770 42. Levine CG, Mitra D, Sharma A, Smith CL, Hegde RS. The efficiency of protein  
771 compartmentalization into the secretory pathway. *Mol Biol Cell*. 2005 Jan;16(1):279–91.
- 772 43. Rapoport TA. Protein translocation across the eukaryotic endoplasmic reticulum and  
773 bacterial plasma membranes. *Nature*. 2007 Nov 29;450(7170):663–9.
- 774 44. Bonardi F, Halza E, Walko M, Du Plessis F, Nouwen N, Feringa BL, et al. Probing the  
775 SecYEG translocation pore size with preproteins conjugated with sizable rigid spherical  
776 molecules. *Proc Natl Acad Sci U S A*. 2011 May;108(19):7775–80.
- 777 45. Arkowitz RA, Joly JC, Wickner W. Translocation can drive the unfolding of a preprotein

- 778 domain. *EMBO J.* 1993 Jan;12(1):243–53.
- 779 46. Hegde RS, Kang SW. The concept of translocational regulation. Vol. 182, *Journal of Cell*  
780 *Biology*. The Rockefeller University Press; 2008. p. 225–32.
- 781 47. Yang SQ, Walter M, Standring DN. Hepatitis B virus p25 precore protein accumulates in  
782 *Xenopus oocytes* as an untranslocated phosphoprotein with an uncleaved signal peptide. *J*  
783 *Virology*. 1992 Jan;66(1):37–45.
- 784 48. Kriegler T, Lang S, Notari L, Hessa T. Prion Protein Translocation Mechanism Revealed  
785 by Pulling Force Studies. *J Mol Biol.* 2020 Jul;432(16):4447–65.
- 786 49. Kriegler T, Kiburg G, Hessa T. Translocon-associated protein complex (TRAP) is crucial  
787 for co-translational translocation of pre-proinsulin. *J Mol Biol.* 2020 Dec  
788 4;432(24):166694.
- 789 50. Guo X, Chen P, Hou X, Xu W, Wang D, Wang TY, et al. The recombined cccDNA  
790 produced using minicircle technology mimicked HBV genome in structure and function  
791 closely. *Sci Rep.* 2016 May 13;6:25552.
- 792 51. Holden P, Horton WA. Crude subcellular fractionation of cultured mammalian cell lines.  
793 *BMC Res Notes.* 2009 Jan;2:243.
- 794 52. Langerová H, Lubyová B, Záborský A, Hubálek M, Glendová K, Aillot L, et al. Hepatitis  
795 B Core Protein Is Post-Translationally Modified through K29-Linked Ubiquitination.  
796 *Cells.* 2020 NOV 26;9(12):2547.
- 797 53. Perez-Riverol Y, Csordas A, Bai J, Bernal-Llinares M, Hewapathirana S, Kundu DJ, et al.  
798 The PRIDE database and related tools and resources in 2019: Improving support for  
799 quantification data. *Nucleic Acids Res.* 2019 Jan 8;47(D1):D442–50.
- 800 54. Ni Y, Sonnabend J, Seitz S, Urban S. The Pre-S2 Domain of the Hepatitis B Virus Is

801           Dispensable for Infectivity but Serves a Spacer Function for L-Protein-Connected Virus

802           Assembly. *J Virol.* 2010 Apr;84(8):3879–88.

803

804
